# Supplementary material for: Metallothioneins act downstream of insulin signaling to regulate toxicity of outdoor fine particulate matter (PM2.5) during Spring Festival in Beijing in nematode Caenorhabditis elegans
Source: Royal Society of Chemistry journal article supplement (doi:10.1039/c6tx00022c), 2016-01-01
Supplement: c6tx00022c1.pdf [file c6tx00022c1.pdf]

**Supporting Information:**

**Table S1.** Information for RT-PCR primers

| Gene         | Forward primer (5'-3') | Reverse primer(5'-3')  |
|--------------|------------------------|------------------------|
| <i>tba-1</i> | TCAACACTGCCATCGCCGCC   | TCCAAGCGAGACCAGGCTTCAG |
| <i>mtl-1</i> | AAATGTGAATGCAGTGGAGA   | CTGGTGTGATGGGTCTTGT    |
| <i>mtl-2</i> | TCCTGCAACACCGGAACTAA   | GAGCAGCCTGAGCACATTCG   |
